# Supplementary material for: Novel Alkylimidazolium Ionic Liquids as an Antibacterial Alternative to Pathogens of the Skin and Soft Tissue Infections
Source: MDPI journal article supplement (doi:10.3390/molecules23092354), 2018-09-14
Supplement: s1 [file s1]

## **Supplementary Information**

### **Novel Alkylimidazolium Ionic Liquids as an Antibacterial Alternative to**

### **Pathogens of the Skin and Soft Tissue Infections**

Forero-Doria O.<sup>1</sup>, Castro RI.<sup>2,3</sup>, Gutiérrez M.<sup>1</sup>, González-Valenzuela D.<sup>4</sup>, Santos LS.<sup>1</sup>, Ramírez D.<sup>5</sup>, Guzmán L.<sup>6\*</sup>

<sup>1</sup> Instituto de Química de Recursos Naturales, Universidad de Talca, Talca, Chile.

<sup>2</sup> Multidisciplinary Agroindustry Research Laboratory, Universidad Autónoma de Chile, Talca, Chile.

<sup>3</sup> Carrera de Ingeniería en Construcción e Instituto de Ciencias Biomédicas, Universidad Autónoma de Chile, Talca, Chile

<sup>4</sup> Departamento de Salud Municipal de Hualañe, Maule, Chile

<sup>5</sup> Instituto de Ciencias Biomédicas, Universidad Autónoma de Chile, Talca, Chile

<sup>6</sup> Departamento de Bioquímica Clínica e Inmunohematología, Facultad de Ciencias de la Salud, Universidad de Talca, Talca, Chile.

\* Corresponding author.

Departamento de Bioquímica Clínica e Inmunohematología

Facultad de Ciencias de la Salud

Universidad de Talca

P.O. Box 747, Talca, Chile

Tel.: +56-71-2200490

E-mail address: lguzman@utalca.cl

## I. $^1\text{H}$ and $^{13}\text{C}$ NMR spectra

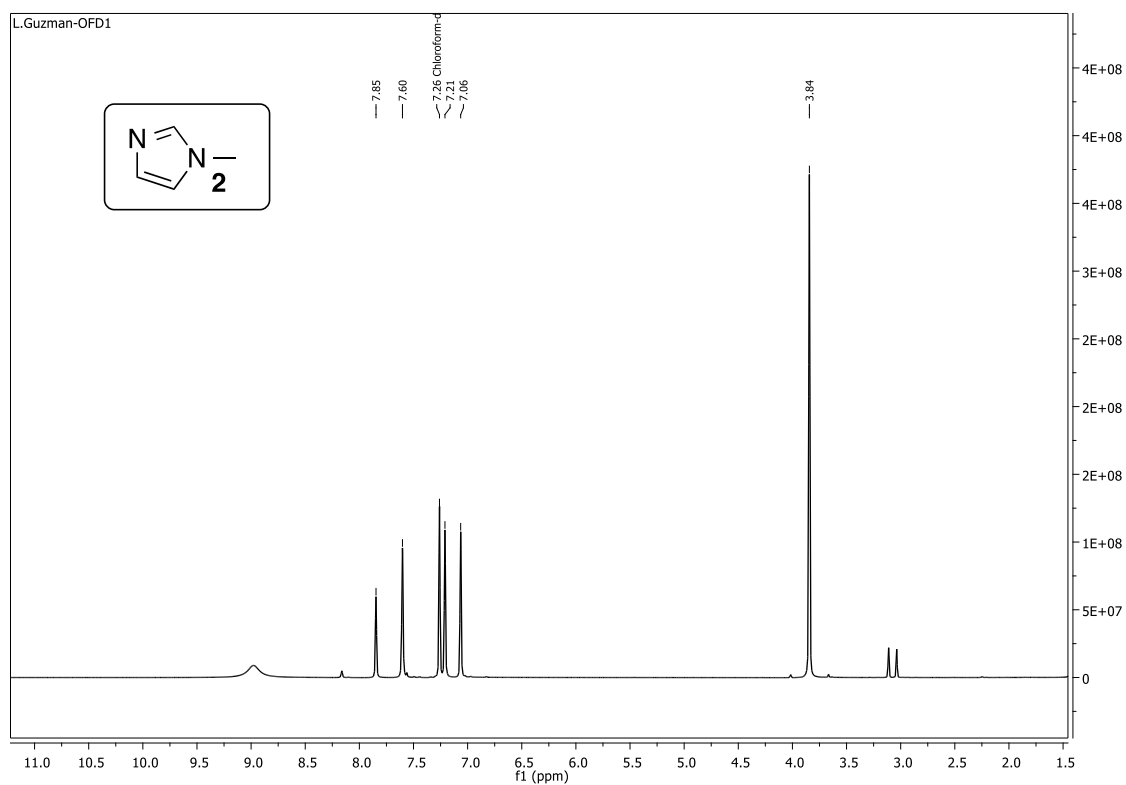

**Figure S1.**  $^1\text{H}$  NMR spectrum (400 MHz,  $\text{CDCl}_3$ ) of compound **2**.

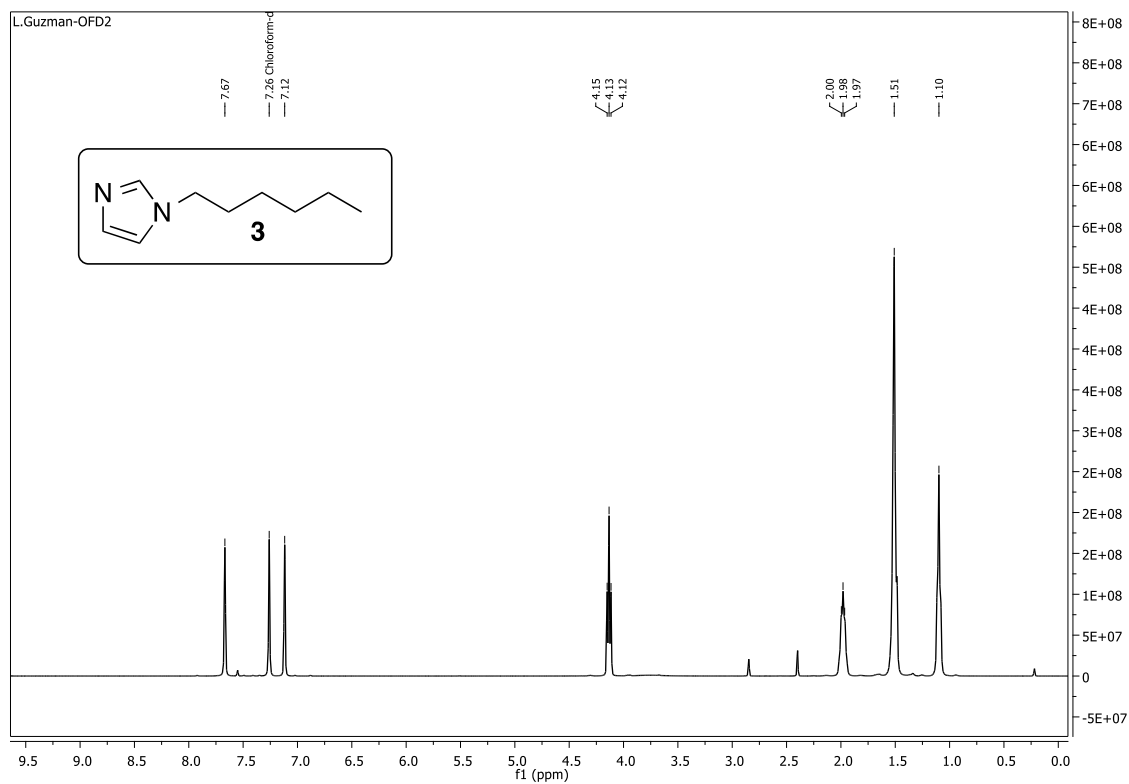

**Figure S2.**  $^1\text{H}$  NMR spectrum (400 MHz,  $\text{CDCl}_3$ ) of compound **3**.

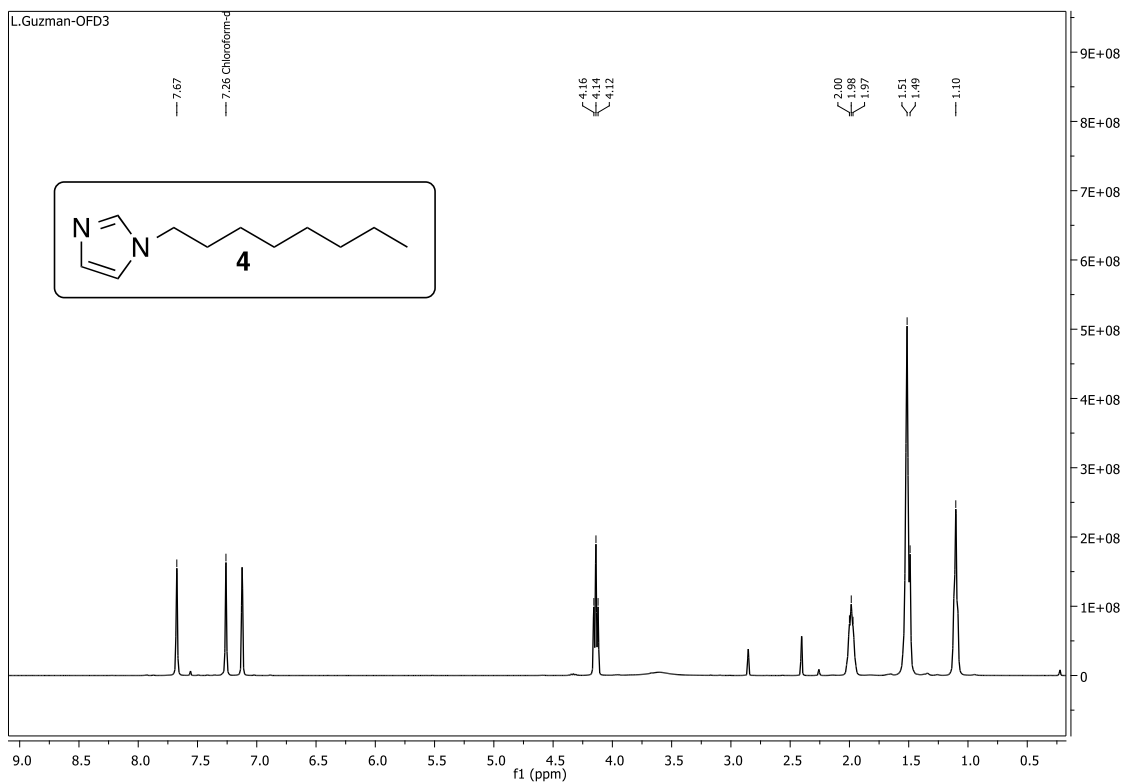

**Figure S3.**  $^1\text{H}$  NMR spectrum (400 MHz,  $\text{CDCl}_3$ ) of compound **4**.

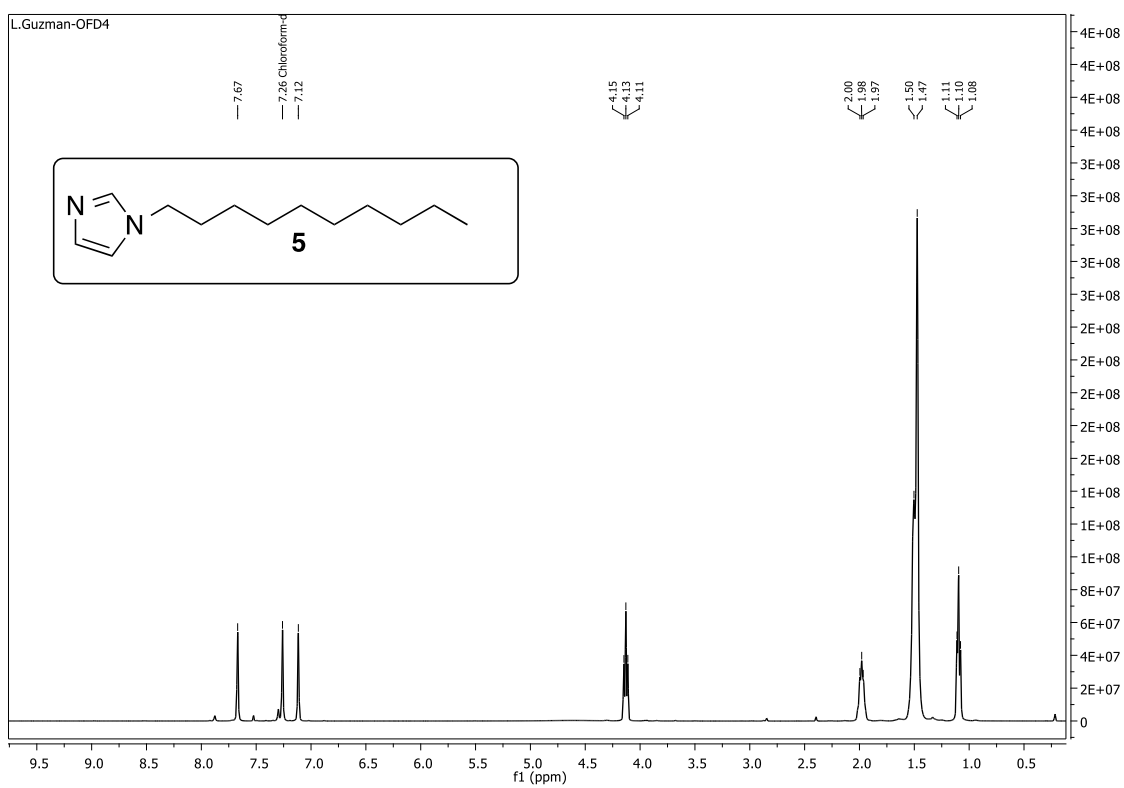

**Figure S4.**  $^1\text{H}$  NMR spectrum (400 MHz,  $\text{CDCl}_3$ ) of compound **5**.

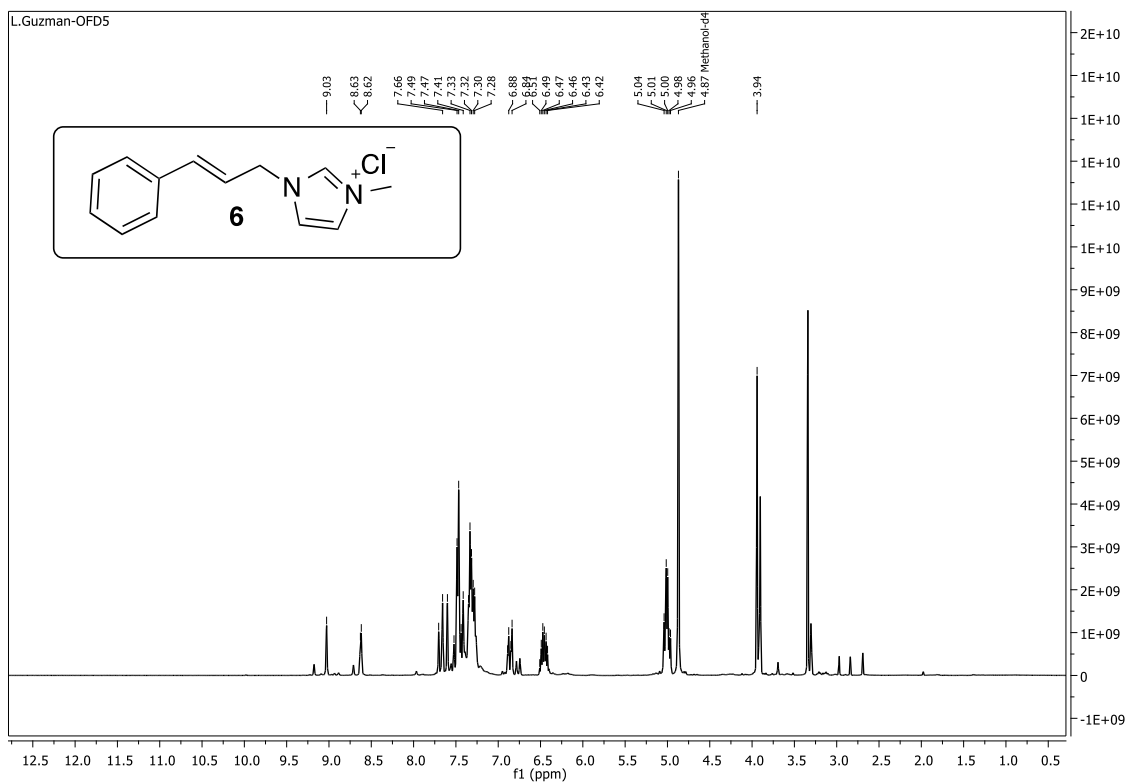

**Figure S5.**  $^1\text{H}$  NMR spectrum (400 MHz, MeOD) of compound **6**.

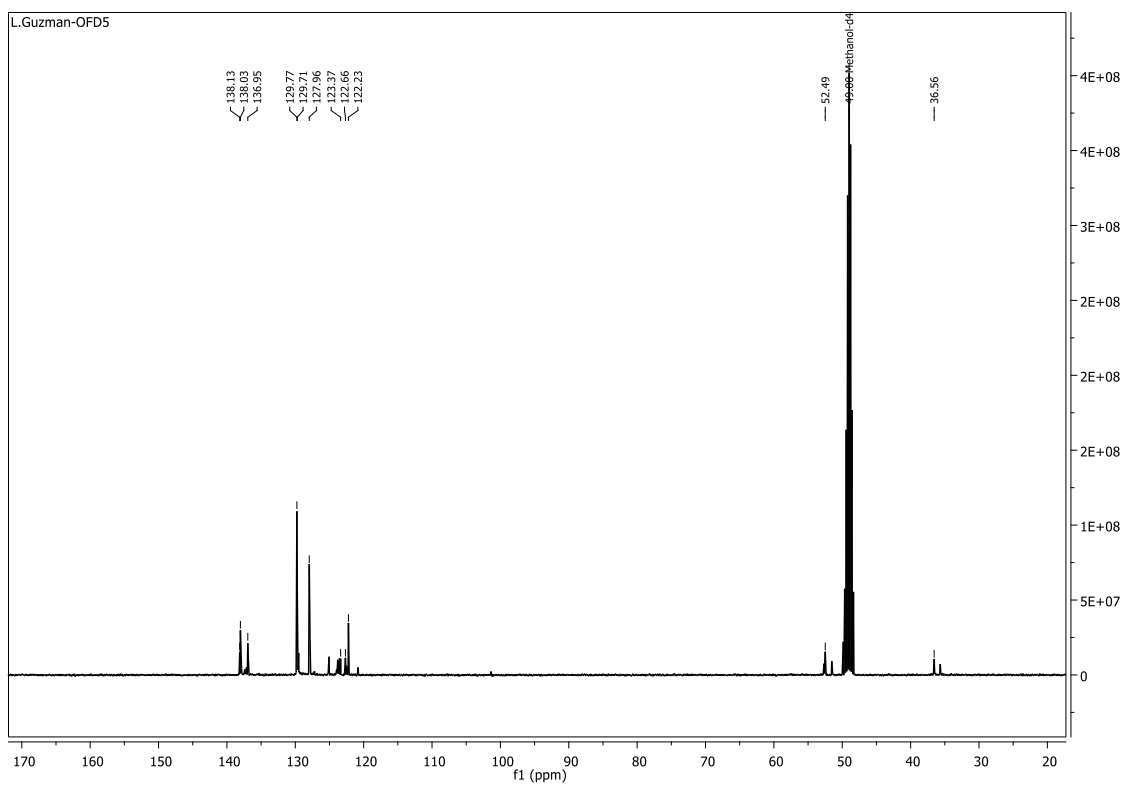

**Figure S6.**  $^{13}\text{C}$  NMR spectrum (101 MHz, MeOD) of compound **6**.



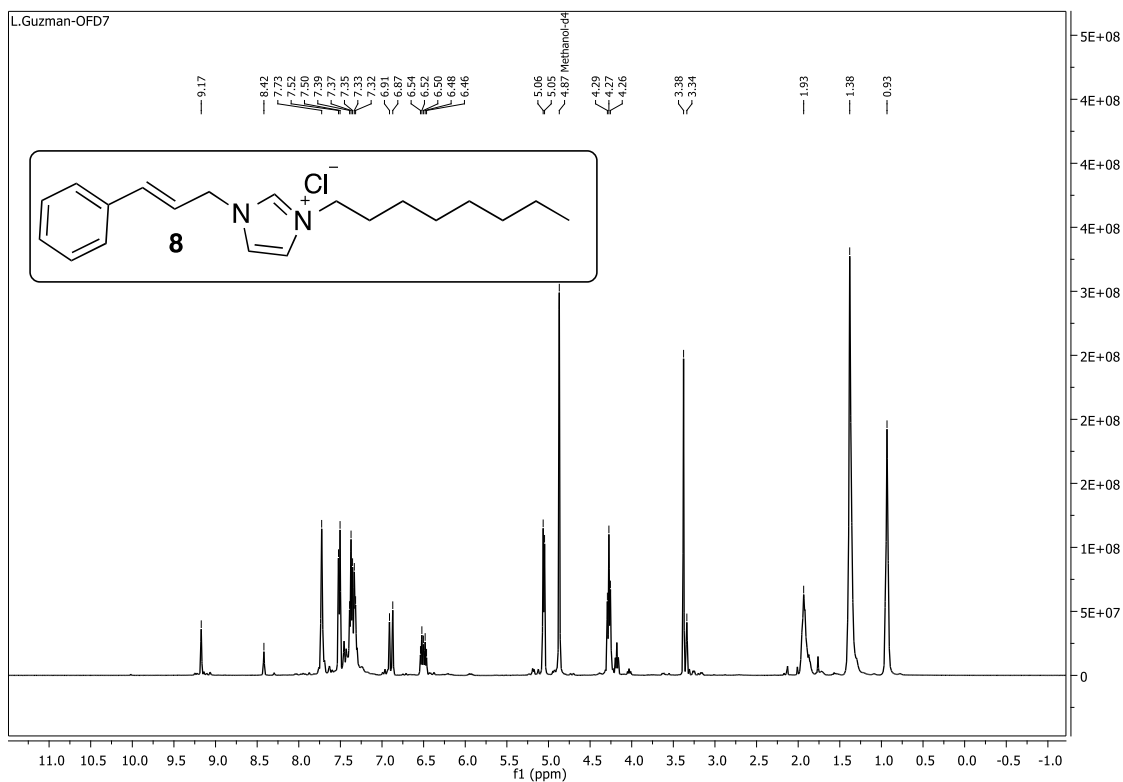

**Figure S9.**  $^1\text{H}$  NMR spectrum (400 MHz, MeOD) of compound **8**.

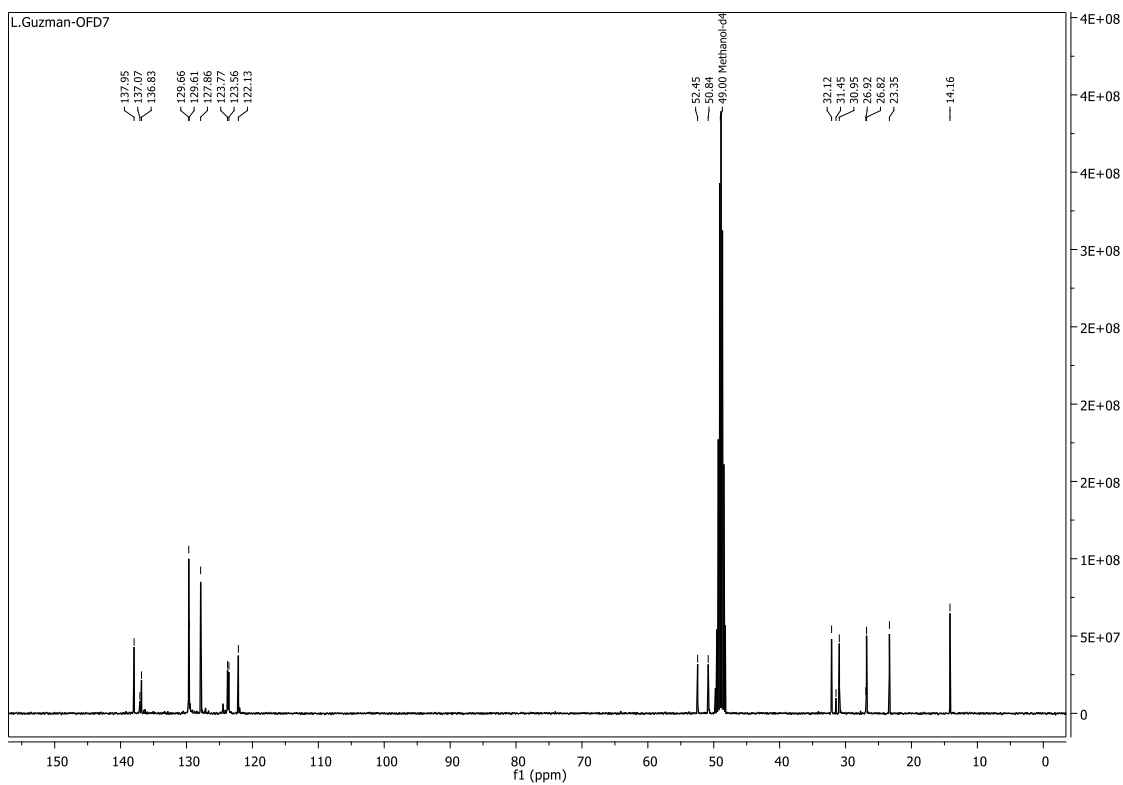

**Figure S10.**  $^{13}\text{C}$  NMR spectrum (101 MHz, MeOD) of compound **8**.

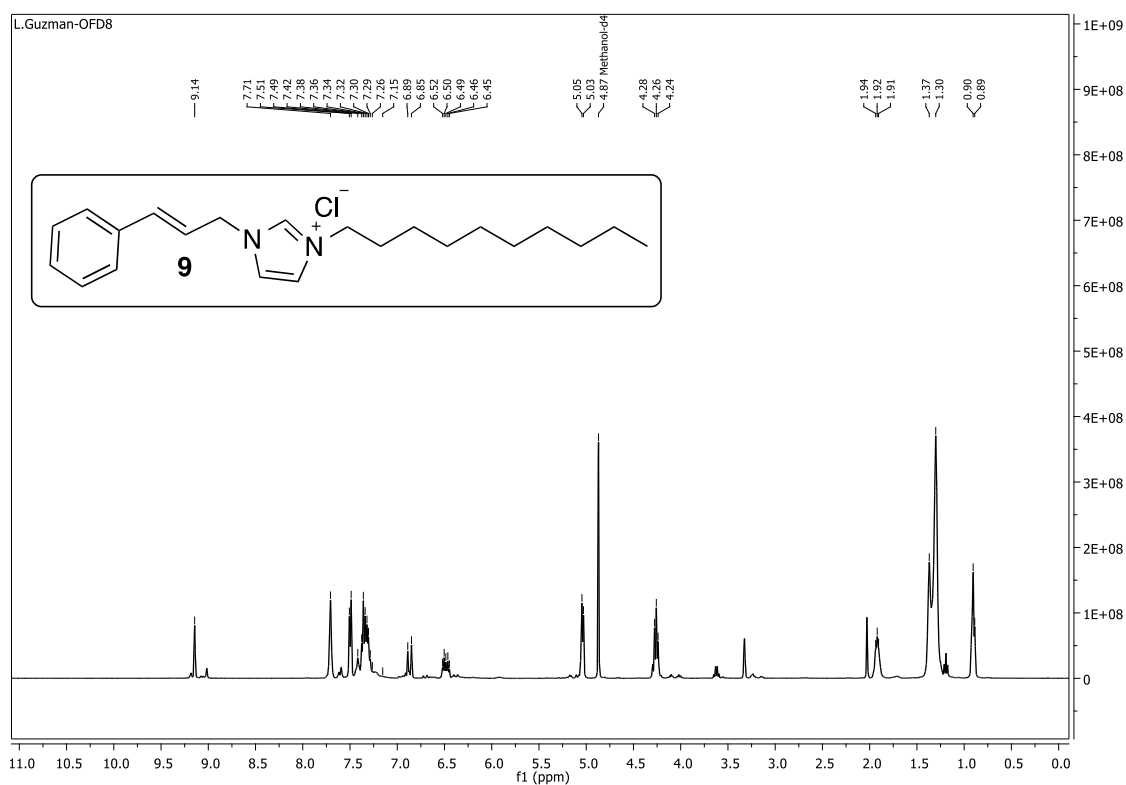

**Figure S11.**  $^1\text{H}$  NMR spectrum (400 MHz, MeOD) of compound **9**.

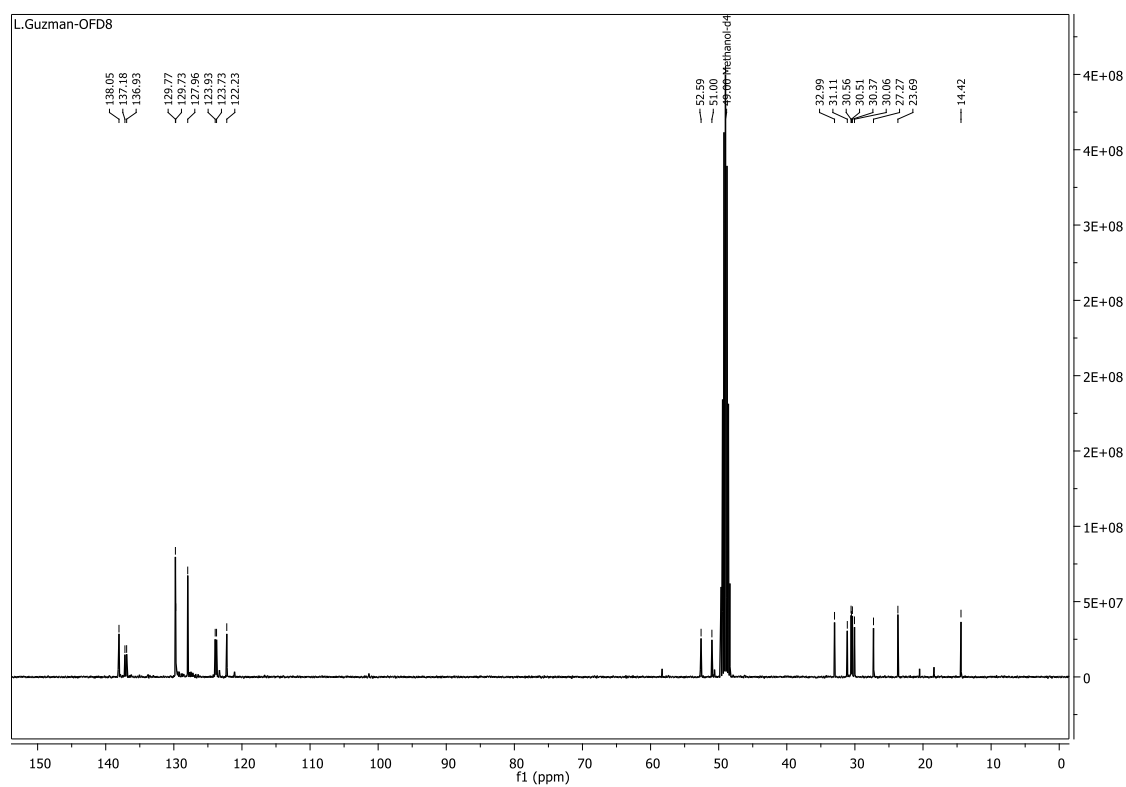

**Figure S12.**  $^{13}\text{C}$  NMR spectrum (101 MHz, MeOD) of compound **9**.

## II. HRMS spectra

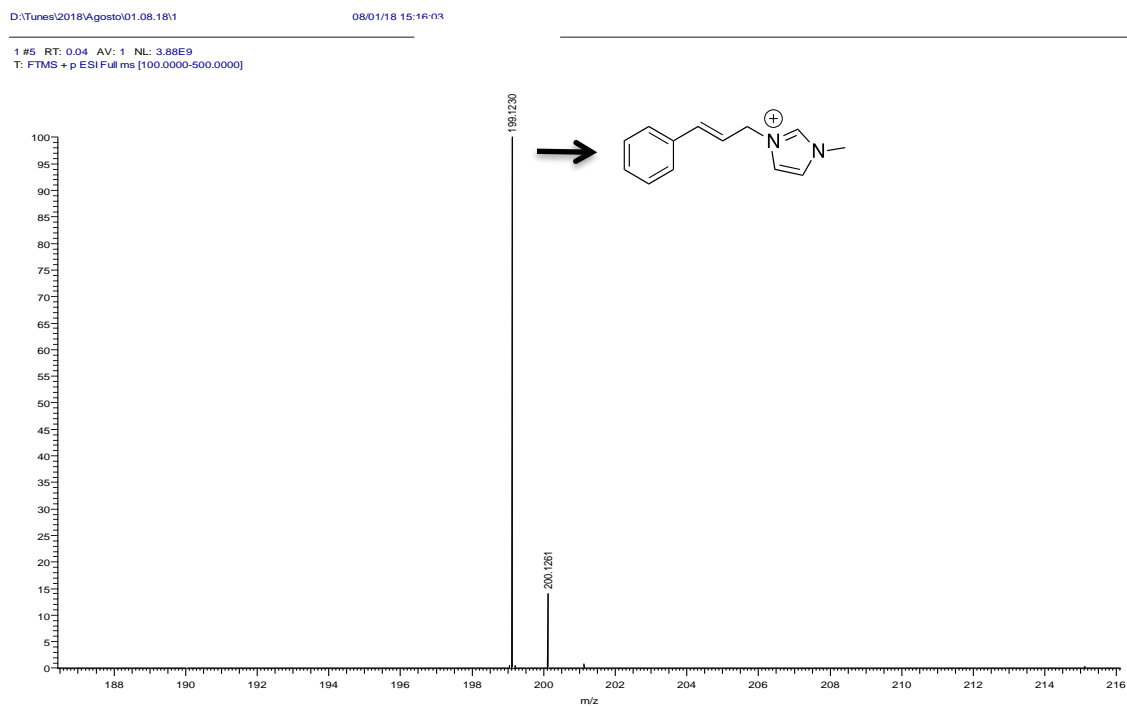

**Figure S13.** HRMS spectrum of compound 6

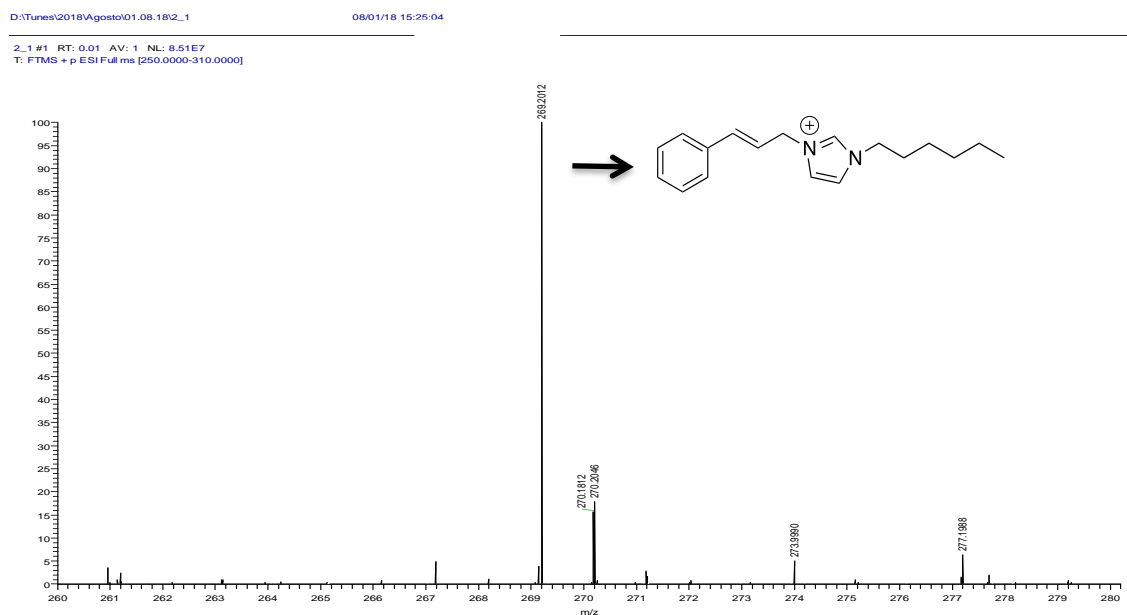

**Figure S14.** HRMS spectrum of compound 7



3\_1 #15 RT: 0.13 AV: 1 NL: 2.37E6  
T: FTMS + p ESI Full ms [295.0000-300.0000]

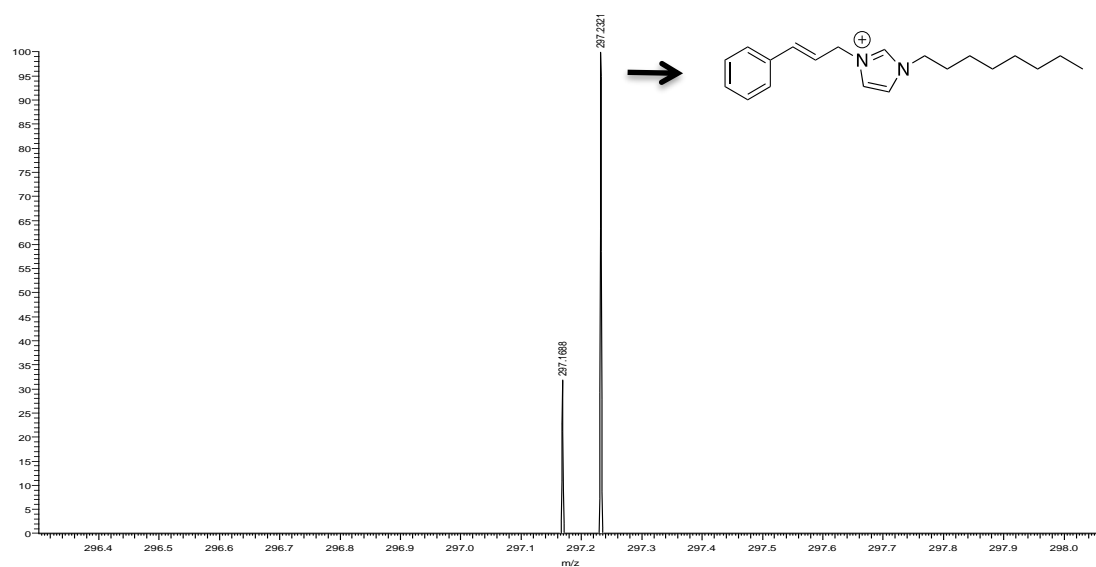

**Figure S15.** HRMS spectrum of compound 8

4\_1 #1 RT: 0.01 AV: 1 NL: 6.94E8  
T: FTMS + p ESI Full ms [320.0000-335.0000]

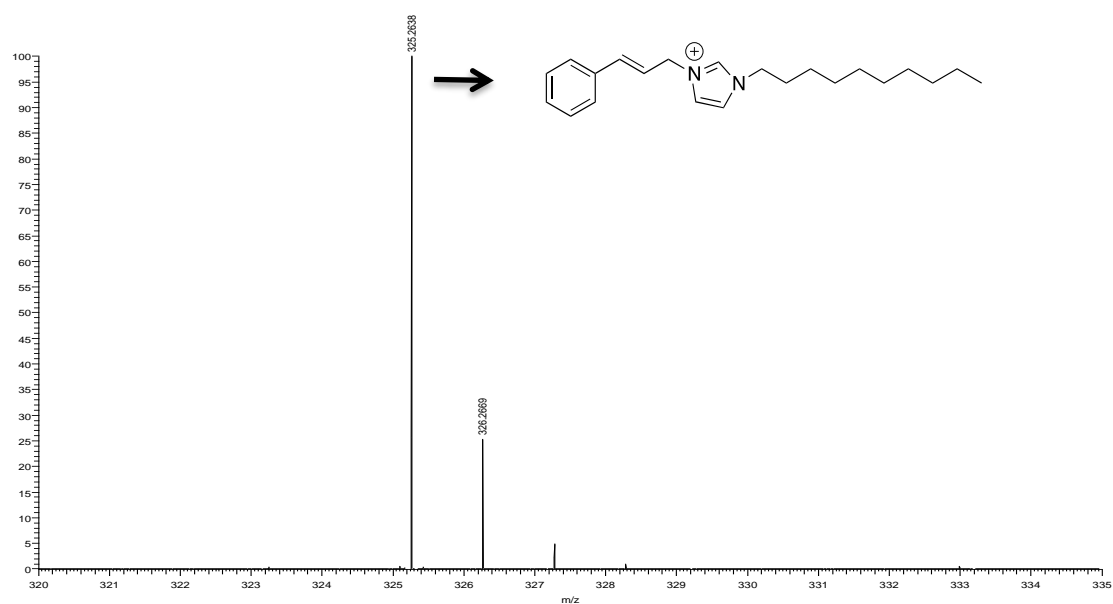

**Figure S16.** HRMS spectrum of compound 9
